# Supplementary material for: Mechanistic studies of in vitro anti-proliferative and anti-inflammatory activities of the Zn(ii)–NSAID complexes of 1,10-phenanthroline-5,6-dione in MDA-MB-231 cells
Source: Royal Society of Chemistry journal article supplement (doi:10.1039/d0dt01721c), 2020-01-01
Supplement: d0dt01721c1.pdf [file d0dt01721c1.pdf]

*Electronic Supplementary Information*

*for*

**Mechanistic studies of in vitro anti-proliferative and anti-inflammatory activities of Zn(II)-NSAID complexes of 1,10-phenanthroline-5,6-dione in MDA-MB-231 cells**

*Jolly Deb<sup>a</sup>, Triloke Ranjan Lakshman<sup>a</sup>, Ivy Ghosh<sup>a</sup>, Siddhartha Sankar Jana<sup>b</sup> and Tapan Kanti Paine<sup>a,\*</sup>*

<sup>a</sup>School of Chemical Sciences, Indian Association for the Cultivation of Science, 2A & 2B Raja S. C. Mullick Road, Jadavpur, Kolkata-700032, India. Email: [ictkp@iacs.res.in](mailto:ictkp@iacs.res.in)

<sup>b</sup>School of Biological Sciences, Indian Association for the Cultivation of Science, 2A & 2B Raja S. C. Mullick Road, Jadavpur, Kolkata-700032, India.

**Table S1** Calculated bond parameters for complex 1.

| <b>Distances/<br/>Angles<br/>(Å)/(°)</b> | <b>[(phendione)Zn<sup>II</sup><br/>(NPR)<sub>2</sub>](uB3LYP/L<br/>anL2DZ)<br/>S=1</b> | <b>[(phendione)Zn<sup>II</sup>(NPR)<sub>2</sub><br/>(H<sub>2</sub>O)]<br/>(uB3LYP/LanL2DZ)<br/>S=1</b> | <b>[(phendione)Zn<sup>II</sup>(NPR)<sub>2</sub><br/>(H<sub>2</sub>O)<sub>2</sub>]<br/>(uB3LYP/LanL2DZ)<br/>S=1</b> |
|------------------------------------------|----------------------------------------------------------------------------------------|--------------------------------------------------------------------------------------------------------|--------------------------------------------------------------------------------------------------------------------|
| Zn1-N1                                   | 2.16694                                                                                | 2.22425                                                                                                | 2.24091                                                                                                            |
| Zn1-N2                                   | 2.19130                                                                                | 2.18747                                                                                                | 2.23378                                                                                                            |
| Zn1-O1                                   | 2.38534                                                                                | -                                                                                                      | -                                                                                                                  |
| Zn1-O2                                   | 2.04800                                                                                | 1.97596                                                                                                | 2.11871                                                                                                            |
| Zn1-O3                                   | 1.96073                                                                                | 2.02377                                                                                                | 2.10618                                                                                                            |
| Zn1-O5                                   | -                                                                                      | 2.12977                                                                                                | 2.09425                                                                                                            |
| Zn1-O6                                   | -                                                                                      | -                                                                                                      | 2.09685                                                                                                            |
| C1-O1                                    | 1.29040                                                                                | 1.27050                                                                                                | 1.29844                                                                                                            |
| C1-O2                                    | 1.31975                                                                                | 1.32373                                                                                                | 1.29837                                                                                                            |
| C2-O3                                    | 1.32548                                                                                | 1.30941                                                                                                | 1.30029                                                                                                            |
| C2-O4                                    | 1.27400                                                                                | 1.28943                                                                                                | 1.29663                                                                                                            |
| N1-Zn1-N2                                | 76.51474                                                                               | 75.38380                                                                                               | 74.23851                                                                                                           |
| N1-Zn1-O1                                | 83.22922                                                                               | -                                                                                                      | -                                                                                                                  |
| N1-Zn1-O2                                | 109.39755                                                                              | 102.95942                                                                                              | 88.31118                                                                                                           |
| N1-Zn1-O3                                | 116.29566                                                                              | 92.96100                                                                                               | 92.84043                                                                                                           |
| N1-Zn1-O5                                | -                                                                                      | 163.01920                                                                                              | 164.61915                                                                                                          |
| N1-Zn1-O6                                | -                                                                                      | -                                                                                                      | 90.39890                                                                                                           |
| N2-Zn1-O1                                | 148.48231                                                                              | -                                                                                                      | -                                                                                                                  |
| N2-Zn1-O2                                | 104.12818                                                                              | 127.88643                                                                                              | 89.18720                                                                                                           |
| N2-Zn1-O3                                | 105.99976                                                                              | 105.03099                                                                                              | 92.57759                                                                                                           |
| N2-Zn1-O5                                | -                                                                                      | 87.63814                                                                                               | 90.42103                                                                                                           |
| N2-Zn1-O6                                | -                                                                                      | -                                                                                                      | 164.17810                                                                                                          |
| O1-Zn1-O3                                | 104.55093                                                                              | -                                                                                                      | -                                                                                                                  |
| O2-Zn1-O3                                | 129.61688                                                                              | 126.92425                                                                                              | 178.10148                                                                                                          |
| Energy<br>(kJ/mol)                       | -6091.802×10 <sup>3</sup>                                                              | -6292.780×10 <sup>3</sup>                                                                              | -6545.774×10 <sup>3</sup>                                                                                          |

**Table S2** Calculated bond parameters for complex 2.

| <b>Distances<br/>/Angles<br/>(Å)/(°)</b> | <b>[(phendione)Zn<sup>II</sup>(MFN)<sub>2</sub>]<br/>(uB3LYP/LanL2DZ)<br/>S=1</b> |
|------------------------------------------|-----------------------------------------------------------------------------------|
| Zn1-N1                                   | 2.20393                                                                           |
| Zn1-N2                                   | 2.20389                                                                           |
| Zn1-O1                                   | 2.17990                                                                           |
| Zn1-O3                                   | 2.15212                                                                           |
| Zn1-O2                                   | 2.15208                                                                           |
| Zn1-O4                                   | 2.17993                                                                           |
| C1-O2                                    | 1.30569                                                                           |
| C2-O3                                    | 1.30568                                                                           |
| C2-O4                                    | 1.32737                                                                           |
| N1-Zn1-N2                                | 75.51244                                                                          |
| N1-Zn1-O1                                | 90.47603                                                                          |
| N1-Zn1-O2                                | 98.09571                                                                          |
| N1-Zn1-O3                                | 96.36871                                                                          |
| N1-Zn1-O4                                | 152.85140                                                                         |
| N2-Zn1-O1                                | 152.86096                                                                         |
| N2-Zn1-O2                                | 96.38246                                                                          |
| N2-Zn1-O3                                | 98.07909                                                                          |
| N2-Zn1-O4                                | 90.47429                                                                          |
| O4-Zn1-O3                                | 62.17800                                                                          |
| O1-Zn1-O3                                | 106.61288                                                                         |
| O2-Zn1-O3                                | 161.67947                                                                         |
| O1-Zn1-O4                                | 110.77742                                                                         |
| O1-Zn1-O2                                | 62.17884                                                                          |
| Energy(kJ/mol)                           | -6187.654×10 <sup>3</sup>                                                         |

**Table S3** Cytotoxic activity data ( $IC_{50}$ ) for the complexes and phendione against human breast cancer cell line (MDA-MB-231) at different time.

|                               | <b>1D</b>   | <b>2D</b>   | <b>3D</b>   |
|-------------------------------|-------------|-------------|-------------|
| Complex 1                     | 1.5 $\mu$ M | 0.6 $\mu$ M | 0.5 $\mu$ M |
| Complex 2                     | 0.7 $\mu$ M | 0.4 $\mu$ M | 0.4 $\mu$ M |
| Phendione                     | 0.3 $\mu$ M | 0.4 $\mu$ M | 0.3 $\mu$ M |
| Phendione +<br>naproxen       | 0.7 $\mu$ M | 0.6 $\mu$ M | 0.4 $\mu$ M |
| Phendione +<br>mefenamic acid | 0.7 $\mu$ M | 0.5 $\mu$ M | 0.4 $\mu$ M |

**Table S4** Production of prostaglandin in  $PGE_2$  assay experiment on breast cancer MDA-MB-231 cell line. The amount of  $PGE_2$  in control was considered as 100%.  $Zn^{2+}$  stands for zinc(II) pechlorate hydrate salt. Standard deviation values are shown in parentheses.

| <b>Well</b>    | <b>Amount of <math>PGE_2</math> produced (%)</b> |
|----------------|--------------------------------------------------|
| Control        | 100                                              |
| $Zn^{2+}$      | 79.75 ( $\pm$ 4.27)                              |
| Phendione      | 69.35 ( $\pm$ 3.68)                              |
| Complex 1      | 10.45 ( $\pm$ 0.55)                              |
| Naproxen       | 13.08 ( $\pm$ 1.28)                              |
| Complex 2      | 17.79 ( $\pm$ 0.46)                              |
| Mefenamic acid | 11.22 ( $\pm$ 0.96)                              |

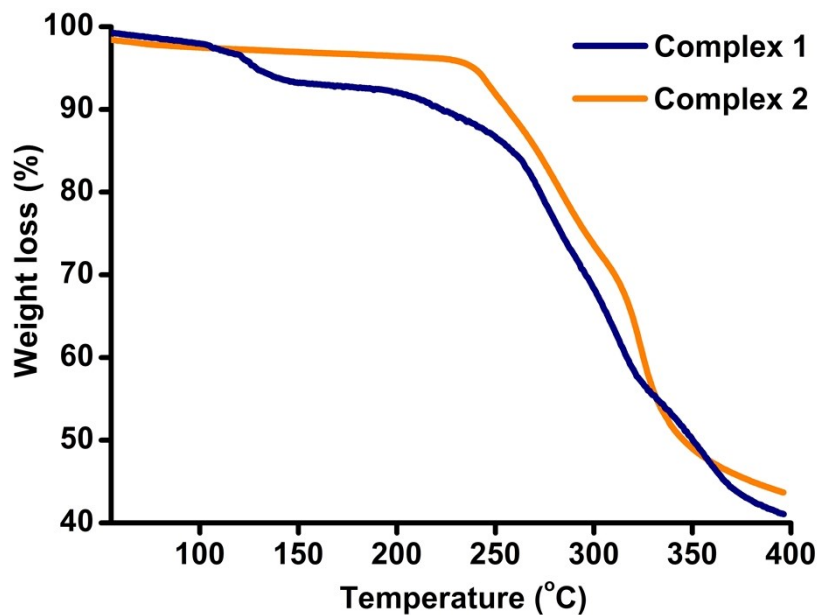

Fig. S1 TGA curves for complexes 1 and 2.

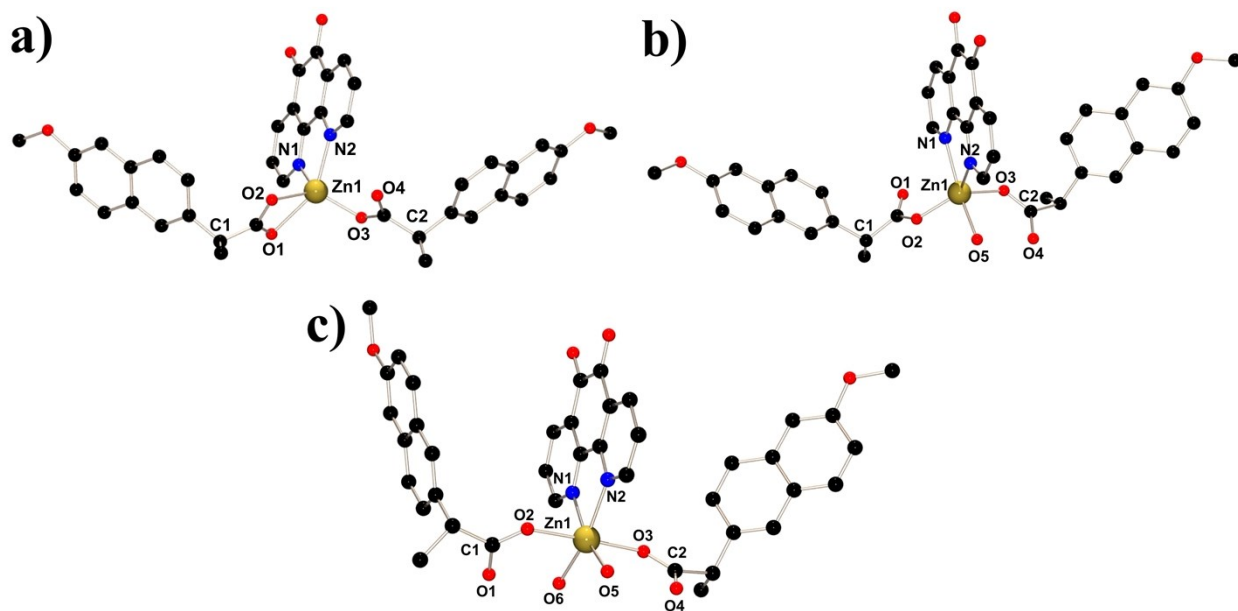

Fig. S2 DFT optimized geometries of (a)  $[(\text{phendione})\text{Zn}^{\text{II}}(\text{NPR})_2]$ , (b)  $[(\text{phendione})\text{Zn}^{\text{II}}(\text{NPR})_2(\text{H}_2\text{O})]$ , and (c)  $[(\text{phendione})\text{Zn}^{\text{II}}(\text{NPR})_2(\text{H}_2\text{O})_2]$  (**1**). For **1**, the O1 and O6 (also O5 and O4 in c) are in hydrogen bonding interaction with the O...O distance of 2.46Å.

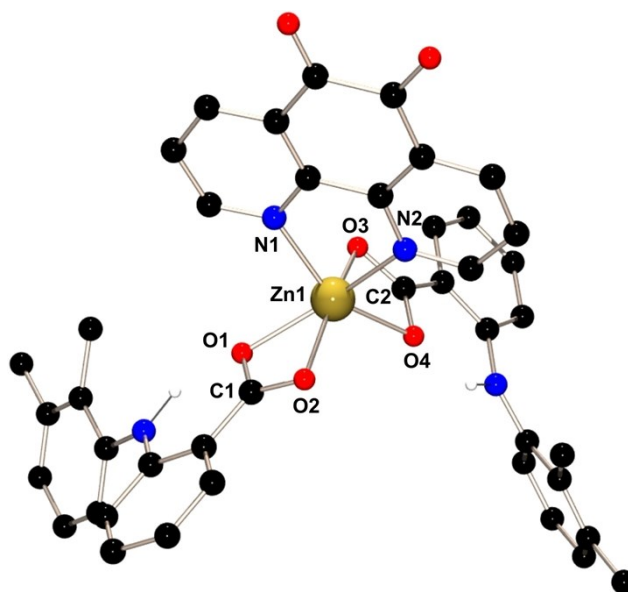

**Fig. S3** DFT optimized geometry of [(phendione)Zn<sup>II</sup>(MFN)<sub>2</sub>] (**2**).

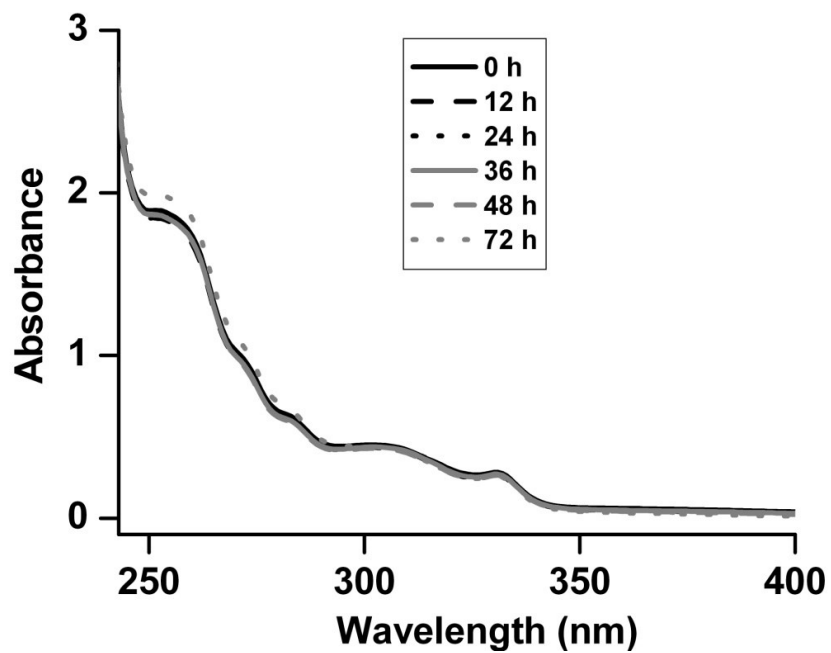

**Fig. S4** UV-vis spectra of **1** in 2% DMSO-PBS buffer recorded at regular time interval for over 72 h of incubation at 310 K.

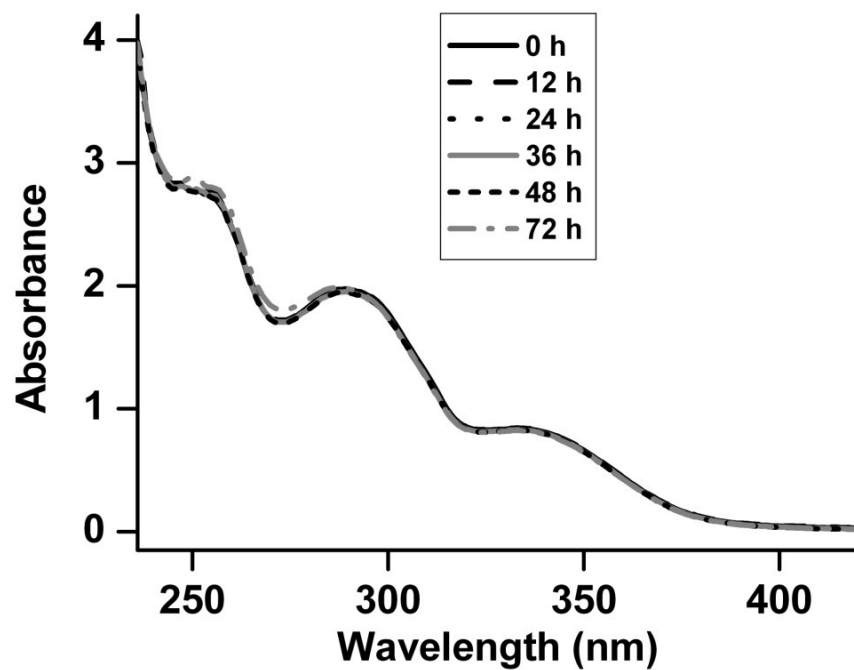

**Fig. S5** UV-vis spectra of **2** in 2% DMSO-PBS buffer recorded at regular time interval for over 72 h of incubation at 310 K.

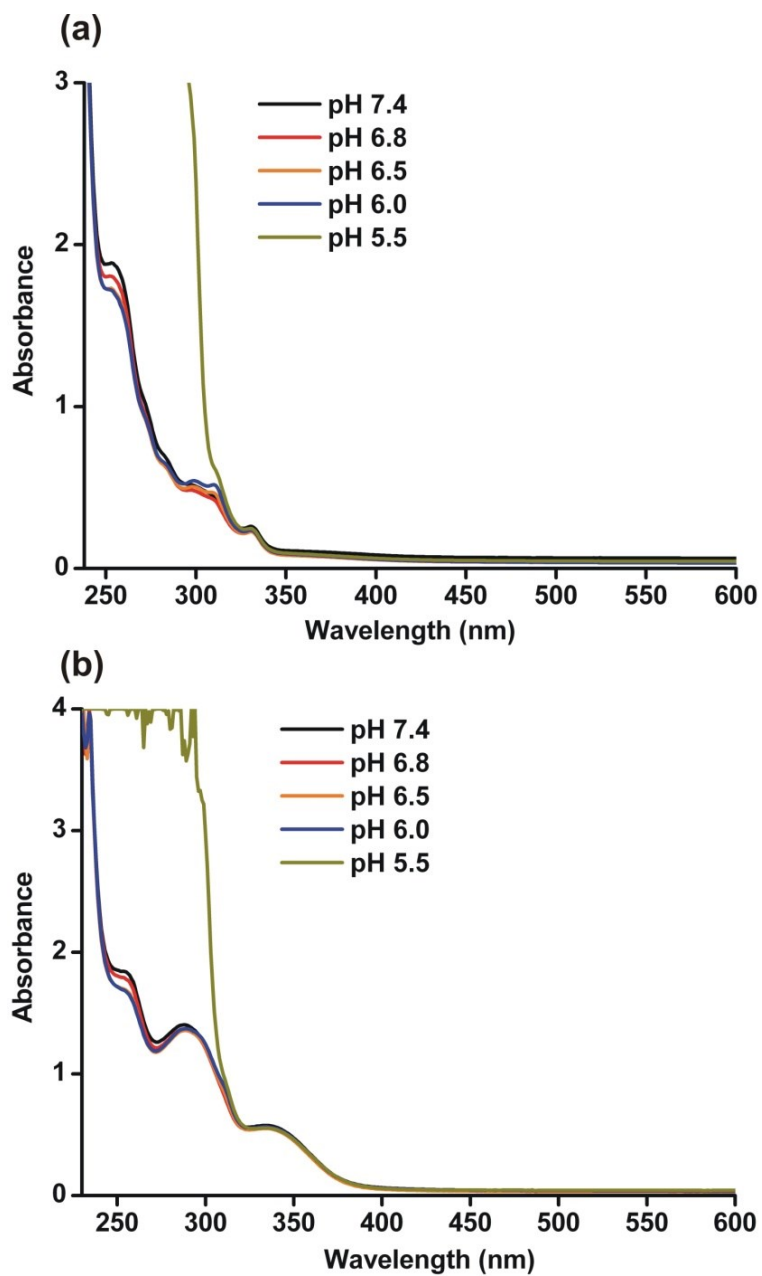

**Fig. S6** Stability of (a) complex 1 and (b) complex 2 at different pH in 2% DMSO-PBS or phthalate buffer at 310 K.



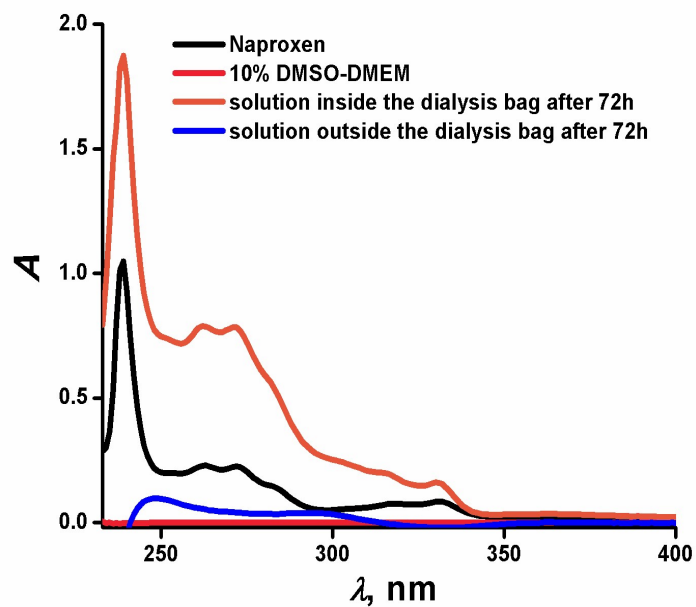

**Fig. S7** UV-Vis spectra of **1** in medium after 72h of *in vitro* dialysis.

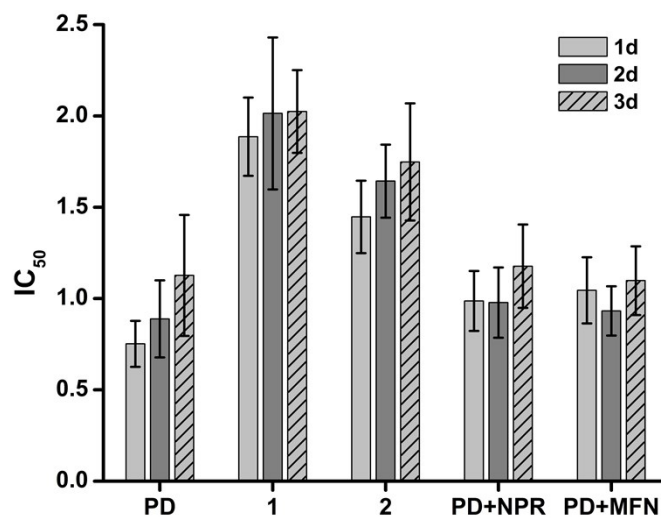

**Fig. S8**  $IC_{50}$  values of phendione, physical mixture of phendione and naproxen, and phendione and mefenamic acid, and complexes **1** and **2** on mouse macrophage RAW 264.7 cells. PD, NPR and MFN stand for phendione, naproxen, and mefenamic acid, respectively.

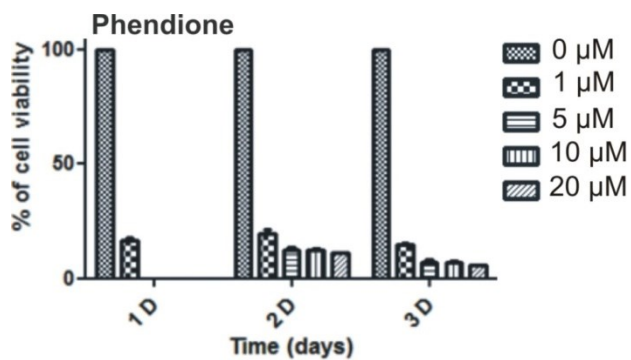

**Fig. S9** MTT assay of phendione on the MDA-MB-231 cell line; 1D, 2D, and 3D stand for 24, 48, and 72 h, respectively.

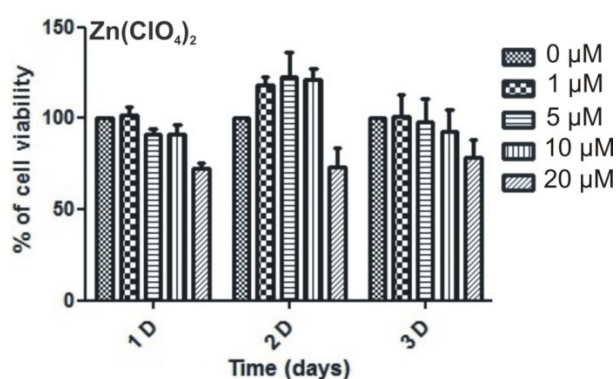

**Fig. S10** MTT assay of  $Zn(ClO_4)_2 \cdot 6H_2O$  on the MDA-MB-231 cell line; 1D, 2D, and 3D stand for 24, 48, and 72 h, respectively.

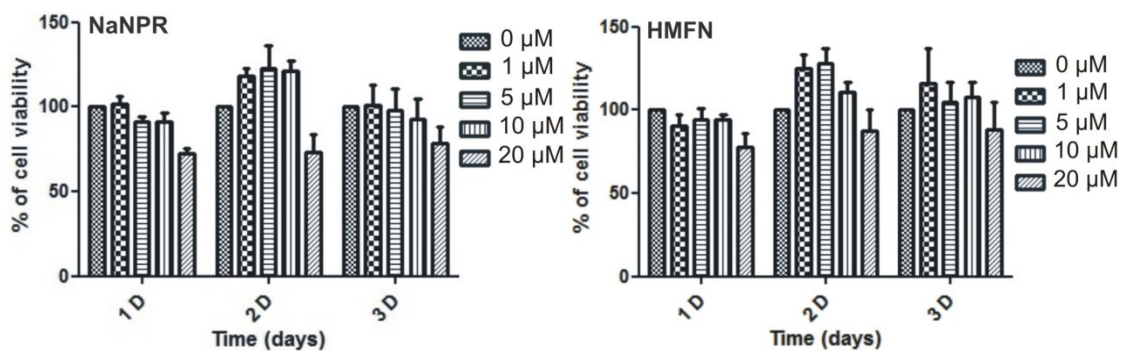

**Fig. S11** MTT assay of NaNPR, HMFN on the MDA-MB-231 cell line; 1D, 2D, and 3D stand for 24, 48, and 72 h, respectively.

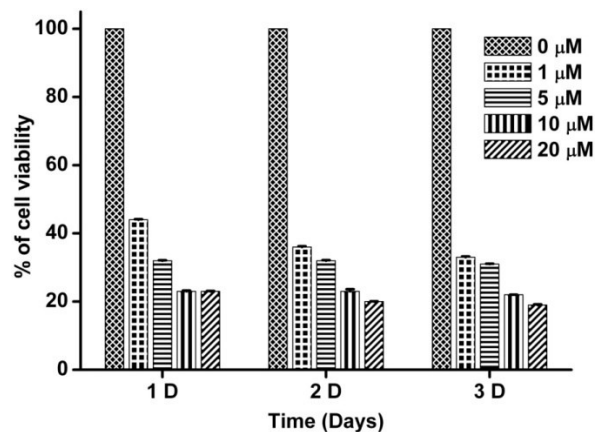

**Fig. S12** MTT assay of phendione + NaNPR (1:2 ratio) on the MDA-MB-231 cell line; 1D, 2D, and 3D stand for 24, 48, and 72 h, respectively.

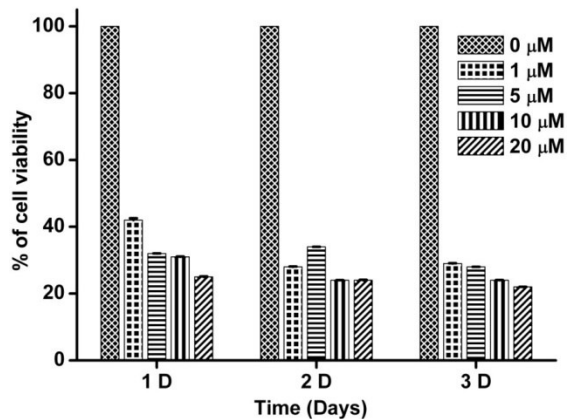

**Fig. S13** MTT assay of phendione + HMFN (1:2 ratio) on the MDA-MB-231 cell line; 1D, 2D, and 3D stand for 24, 48, and 72 h, respectively.

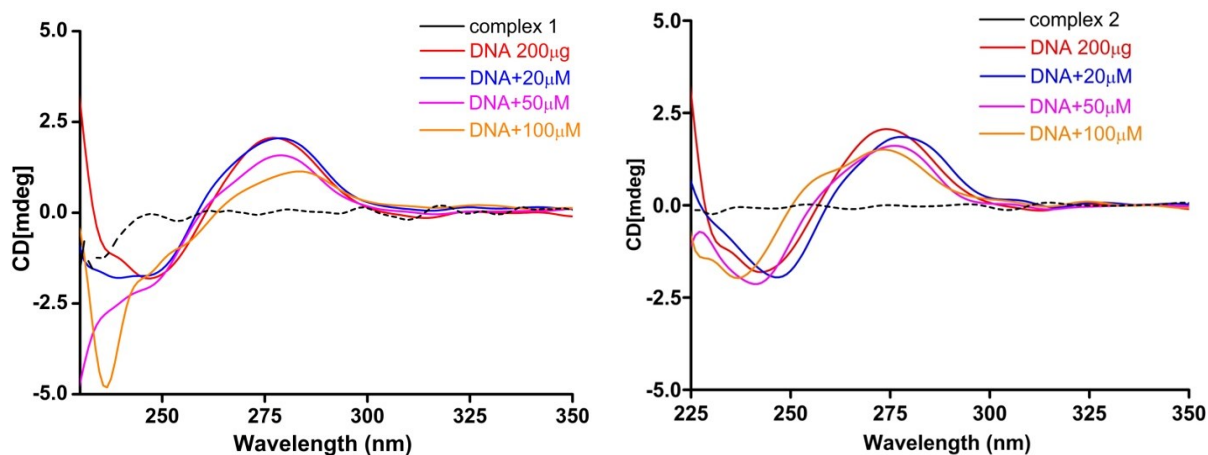

*Fig. S14 CD of CT DNA after addition of 1 and 2 in DMSO-water at 298 K.*

***Cartesian coordinates for the optimised structures***

***Cartesian coordinates for the optimized structure of [(phendione)Zn<sup>II</sup>(NPR)<sub>2</sub>]:***

| Atom  | Coordinates (Angstroms) |             |             |
|-------|-------------------------|-------------|-------------|
|       | X                       | Y           | Z           |
| ----- |                         |             |             |
| Zn    | -0.04180300             | -1.06419400 | -0.08205600 |
| O     | -1.65893800             | -1.93040200 | 0.82835700  |
| O     | 1.64077500              | -1.87561200 | -0.67786300 |
| N     | -0.68092200             | 0.71178600  | -1.14650500 |
| N     | 0.51960000              | 0.56943500  | 1.26623000  |
| C     | -0.47719000             | 1.88645900  | -0.49618300 |
| C     | 0.04625900              | 4.31456100  | 1.07908600  |
| C     | 0.43382200              | 2.96977500  | 1.58555600  |

|   |             |             |             |
|---|-------------|-------------|-------------|
| C | 0.17656600  | 1.80812800  | 0.82749000  |
| C | -1.29356100 | 0.70668400  | -2.35493100 |
| H | -1.46050500 | -0.27355300 | -2.78862200 |
| C | 1.06895500  | 2.82323900  | 2.83958600  |
| H | 1.27027500  | 3.71005300  | 3.43317900  |
| C | -0.87323200 | 3.12276300  | -1.04849700 |
| C | -0.63982200 | 4.39624700  | -0.31253900 |
| C | 1.42863400  | 1.54241800  | 3.27897600  |
| H | 1.92756200  | 1.39286200  | 4.23000500  |
| C | -1.49734500 | 3.12175400  | -2.31581700 |
| H | -1.80517200 | 4.06818400  | -2.75036500 |
| C | 1.14404300  | 0.42747000  | 2.46124500  |
| H | 1.43582400  | -0.58815600 | 2.71180600  |
| C | -1.71024900 | 1.90291000  | -2.97489100 |
| H | -2.19516100 | 1.86374500  | -3.94388700 |
| C | -2.26220400 | -2.36116800 | -0.26354500 |
| C | 2.46309600  | -2.31445900 | 0.26453200  |
| O | 0.25218200  | 5.35778400  | 1.72988600  |
| O | -0.97303800 | 5.50388200  | -0.77704600 |
| O | 2.21104200  | -2.18803300 | 1.50693000  |
| O | -1.71927600 | -2.12009400 | -1.40908200 |

|   |            |             |             |
|---|------------|-------------|-------------|
| C | 3.75215500 | -2.99175000 | -0.23053100 |
| C | 3.93551500 | -4.36110000 | 0.47437500  |
| H | 3.08607800 | -5.02241200 | 0.26099000  |
| H | 4.85342100 | -4.84796900 | 0.12312200  |
| H | 3.99754100 | -4.23267700 | 1.55995200  |
| C | 4.95996800 | -2.07640900 | -0.01907800 |
| C | 5.32006000 | -1.63783400 | 1.30055600  |
| C | 5.74336900 | -1.67401000 | -1.09383800 |
| C | 6.43009600 | -0.83585100 | 1.50909400  |
| H | 4.69201500 | -1.93674600 | 2.13529400  |
| C | 6.89698600 | -0.84582400 | -0.91374600 |
| H | 5.48204900 | -1.99197900 | -2.10225600 |
| C | 7.25547200 | -0.41580400 | 0.41482500  |
| H | 6.69087400 | -0.51323600 | 2.51538300  |
| H | 3.62336500 | -3.15302100 | -1.30547700 |
| C | 7.71417800 | -0.42783700 | -2.00567600 |
| C | 8.40364900 | 0.40524600  | 0.59978900  |
| C | 8.83288800 | 0.37428600  | -1.81036200 |
| H | 9.43526500 | 0.67525800  | -2.66163200 |
| C | 9.17919400 | 0.79366600  | -0.48888200 |
| H | 7.45214000 | -0.74785300 | -3.01232000 |

|   |             |             |             |
|---|-------------|-------------|-------------|
| H | 8.69046700  | 0.73778100  | 1.59361700  |
| O | 10.28738600 | 1.60072600  | -0.19956200 |
| C | 11.15109600 | 2.02992800  | -1.28913600 |
| H | 10.60511700 | 2.64793100  | -2.01595300 |
| H | 11.93255300 | 2.62844400  | -0.81609100 |
| H | 11.60643200 | 1.17164700  | -1.80309500 |
| C | -3.58661500 | -3.11401500 | -0.14944200 |
| H | -3.74543100 | -3.59536300 | -1.12076400 |
| C | -3.50662700 | -4.20072900 | 0.95337300  |
| H | -2.71009100 | -4.92154300 | 0.72997600  |
| H | -3.28819900 | -3.75028600 | 1.92651600  |
| H | -4.45860900 | -4.74125500 | 1.01831400  |
| C | -4.73599900 | -2.13134500 | 0.09411000  |
| C | -5.80086700 | -2.05235000 | -0.79465000 |
| C | -4.74143200 | -1.29089000 | 1.25865100  |
| C | -6.90044900 | -1.16388000 | -0.57026900 |
| H | -5.81031900 | -2.67885200 | -1.68556600 |
| C | -5.78994000 | -0.41942300 | 1.50387300  |
| H | -3.89699500 | -1.34066300 | 1.94083800  |
| C | -6.90204400 | -0.32701700 | 0.60372400  |
| H | -5.78079200 | 0.20991300  | 2.39173800  |

|   |              |             |             |
|---|--------------|-------------|-------------|
| C | -8.00438500  | -1.07428300 | -1.46912600 |
| C | -7.99397200  | 0.55707300  | 0.83258200  |
| C | -9.05585800  | 0.61836200  | -0.06564800 |
| C | -9.06433900  | -0.20638500 | -1.23278900 |
| H | -9.89088800  | -0.16278600 | -1.93493400 |
| H | -8.01342500  | -1.70295600 | -2.35743500 |
| H | -8.01428500  | 1.19375800  | 1.71270000  |
| O | -10.07944600 | 1.51964600  | 0.25083300  |
| C | -11.23526000 | 1.61356300  | -0.62875200 |
| H | -11.88400100 | 2.36225600  | -0.16938400 |
| H | -10.94801000 | 1.94561000  | -1.63641500 |
| H | -11.76891100 | 0.65495200  | -0.69382500 |

*Cartesian coordinates for the optimized structure of [(phendione)Zn<sup>II</sup>(NPR)<sub>2</sub>(H<sub>2</sub>O)]:*

| Atom  | Coordinates (Angstroms) |             |             |
|-------|-------------------------|-------------|-------------|
|       | X                       | Y           | Z           |
| ----- |                         |             |             |
| Zn    | 0.18309700              | -1.14235500 | -0.64976500 |
| O     | -1.52142000             | -1.95738600 | 0.07548700  |
| O     | 1.99052600              | -1.93990600 | -0.61061000 |
| N     | -0.44327100             | 0.71898500  | -1.61314500 |
| N     | 0.27651500              | 0.38445000  | 0.96498700  |



|   |             |             |             |
|---|-------------|-------------|-------------|
| C | -0.59569900 | 1.79063400  | -0.79315300 |
| C | -0.86453500 | 3.98400700  | 1.14777600  |
| C | -0.33500200 | 2.65526500  | 1.55559300  |
| C | -0.20898700 | 1.60479500  | 0.62134800  |
| C | -0.77938900 | 0.82099800  | -2.92141300 |
| H | -0.64154200 | -0.08544100 | -3.50193700 |
| C | 0.05603500  | 2.41242700  | 2.89192500  |
| H | -0.03918100 | 3.21179500  | 3.62084400  |
| C | -1.09524100 | 3.02396000  | -1.26335900 |
| C | -1.25446000 | 4.18326600  | -0.34216400 |
| C | 0.56143500  | 1.15277000  | 3.23656200  |
| H | 0.88148500  | 0.93206800  | 4.24892300  |
| C | -1.44246800 | 3.13255000  | -2.62790700 |
| H | -1.82974200 | 4.07739200  | -2.99749300 |
| C | 0.66570100  | 0.15329900  | 2.24386000  |
| H | 1.09638700  | -0.82994100 | 2.42572600  |
| C | -1.28262600 | 2.02039700  | -3.46613200 |
| H | -1.54353700 | 2.06523000  | -4.51771300 |
| C | -2.36184600 | -2.76849900 | -0.51639700 |
| C | 2.72420300  | -2.31773300 | 0.42438900  |
| O | -1.00116900 | 4.92580300  | 1.95376600  |
| O | -1.68265000 | 5.28747300  | -0.73122000 |
| O | 2.35419600  | -2.20760400 | 1.63481800  |
| O | -2.21772300 | -3.17953200 | -1.73003100 |
| O | -0.10416500 | -2.10725600 | -2.52656300 |

|   |             |             |             |
|---|-------------|-------------|-------------|
| H | 0.66884000  | -2.64284700 | -2.78381900 |
| H | -0.98485700 | -2.65313000 | -2.37126900 |
| C | 4.10348500  | -2.91373500 | 0.07281000  |
| C | 4.35794500  | -4.20386400 | 0.89311400  |
| H | 3.59403800  | -4.96065000 | 0.67250400  |
| H | 5.34311300  | -4.62102900 | 0.65078000  |
| H | 4.31800800  | -3.99228300 | 1.96644100  |
| C | 5.20469100  | -1.87430600 | 0.29372300  |
| C | 5.41413400  | -1.30078400 | 1.59398100  |
| C | 6.03508700  | -1.48458500 | -0.74982400 |
| C | 6.42746200  | -0.38243000 | 1.81490400  |
| H | 4.74919600  | -1.59156100 | 2.40286000  |
| C | 7.09203300  | -0.53887300 | -0.55610900 |
| H | 5.88704800  | -1.90411600 | -1.74411000 |
| C | 7.29953300  | 0.02723100  | 0.75340100  |
| H | 6.57391900  | 0.04256500  | 2.80612800  |
| H | 4.07500900  | -3.16093100 | -0.99369500 |
| C | 7.95625000  | -0.13266100 | -1.61563900 |
| C | 8.35049900  | 0.96693700  | 0.95208400  |
| C | 8.97906400  | 0.78577400  | -1.40718500 |
| H | 9.62111100  | 1.07424600  | -2.23341100 |
| C | 9.17530300  | 1.34066000  | -0.10503200 |
| H | 7.80796200  | -0.55506500 | -2.60764600 |
| H | 8.52313900  | 1.40332300  | 1.93203400  |
| O | 10.17865100 | 2.27186800  | 0.19474300  |

|   |              |             |             |
|---|--------------|-------------|-------------|
| C | 11.08244800  | 2.69896600  | -0.86254600 |
| H | 10.54006900  | 3.19798300  | -1.67814000 |
| H | 11.76239100  | 3.40984700  | -0.38822500 |
| H | 11.65764200  | 1.85341400  | -1.26550900 |
| C | -3.58678000  | -3.24473600 | 0.27919300  |
| H | -4.03028200  | -4.04744900 | -0.31917000 |
| C | -3.15763800  | -3.81301900 | 1.65541800  |
| H | -2.46539700  | -4.65497000 | 1.52807200  |
| H | -2.64963300  | -3.05017100 | 2.25356800  |
| H | -4.03680900  | -4.16661700 | 2.20746700  |
| C | -4.61442900  | -2.11725100 | 0.40567400  |
| C | -5.85346300  | -2.21826500 | -0.21529300 |
| C | -4.32340900  | -0.94136100 | 1.17672600  |
| C | -6.83907800  | -1.18721400 | -0.09781300 |
| H | -6.08920400  | -3.09924600 | -0.81049000 |
| C | -5.25628800  | 0.07385100  | 1.31309000  |
| H | -3.34791900  | -0.85632200 | 1.64679900  |
| C | -6.54188600  | -0.01346400 | 0.68463900  |
| H | -5.02359400  | 0.95591600  | 1.90696700  |
| C | -8.11566300  | -1.27800300 | -0.72775400 |
| C | -7.52030400  | 1.01317700  | 0.80774200  |
| C | -8.75662700  | 0.89138800  | 0.17936800  |
| C | -9.06153400  | -0.26745500 | -0.59968100 |
| H | -10.02447800 | -0.36574900 | -1.09064500 |
| H | -8.34897600  | -2.16018800 | -1.32062700 |

|   |              |            |             |
|---|--------------|------------|-------------|
| H | -7.31616000  | 1.90434400 | 1.39482700  |
| O | -9.64810500  | 1.95539000 | 0.36186400  |
| C | -10.96287900 | 1.88928300 | -0.25909400 |
| H | -11.46183100 | 2.81707400 | 0.02841500  |
| H | -10.88746500 | 1.83684300 | -1.35436200 |
| H | -11.53996400 | 1.03109500 | 0.11301200  |

***Cartesian coordinates for the optimized structure of [(phendione)Zn<sup>II</sup>(NPR)<sub>2</sub>(H<sub>2</sub>O)<sub>2</sub>]:***

| Atom  | Coordinates (Angstroms) |             |             |
|-------|-------------------------|-------------|-------------|
|       | X                       | Y           | Z           |
| ----- |                         |             |             |
| Zn    | 0.14862168              | -1.03865140 | -0.01606900 |
| O     | -1.61194250             | -1.57922470 | 0.48332279  |
| O     | 1.81152821              | -1.70579025 | -0.65264785 |
| N     | -0.18093552             | 0.49557579  | -1.19481488 |
| N     | 0.56353329              | 0.40967710  | 1.25627196  |
| C     | -0.14029912             | 1.67645058  | -0.62221469 |
| C     | 0.05641629              | 4.13361122  | 0.97649284  |
| C     | 0.42500098              | 2.76629843  | 1.59292524  |
| C     | 0.29829614              | 1.63026955  | 0.81567170  |
| C     | -0.43675046             | 0.36929691  | -2.50402489 |
| H     | -0.40185799             | -0.59455898 | -2.96760067 |
| C     | 0.89169488              | 2.61972472  | 2.89923986  |
| H     | 0.98836992              | 3.46778480  | 3.54437509  |

|   |             |             |             |
|---|-------------|-------------|-------------|
| C | -0.44822306 | 2.85264052  | -1.28634263 |
| C | -0.39575158 | 4.17641313  | -0.50353090 |
| C | 1.23742321  | 1.32545409  | 3.34632984  |
| H | 1.62612809  | 1.18260559  | 4.33235250  |
| C | -0.78428692 | 2.77599272  | -2.64195365 |
| H | -1.05179435 | 3.65372605  | -3.19371809 |
| C | 1.06823508  | 0.21769118  | 2.48604395  |
| H | 1.33700360  | -0.76448617 | 2.81600998  |
| C | -0.75559099 | 1.51388332  | -3.26495767 |
| H | -0.97954210 | 1.41962119  | -4.30549757 |
| C | -2.33452002 | -2.34261366 | -0.28248595 |
| C | 2.57812393  | -2.29661891 | 0.21222808  |
| O | 0.12597710  | 5.18512037  | 1.65835268  |
| O | -0.70512341 | 5.26355847  | -1.05287166 |
| O | 2.18496318  | -2.41348826 | 1.40185876  |
| O | -2.02662000 | -2.49314299 | -1.53866503 |
| O | -0.80942516 | -1.87550373 | -1.43900000 |
| H | -0.66339541 | -2.82114432 | -1.40299667 |
| H | -1.74904678 | -1.69542305 | -1.34582245 |
| C | 3.94593943  | -2.86465326 | -0.18995245 |
| C | 4.21472289  | -4.13623738 | 0.64125979  |
| H | 3.45418521  | -4.86006542 | 0.43790483  |
| H | 5.16989596  | -4.53859412 | 0.37615400  |
| H | 4.20687492  | -3.89360963 | 1.68247842  |
| C | 5.06151540  | -1.83439101 | 0.08744754  |

|   |             |             |             |
|---|-------------|-------------|-------------|
| C | 5.65638009  | -1.79844671 | 1.35737950  |
| C | 5.49209768  | -0.94895284 | -0.91167190 |
| C | 6.68671805  | -0.95068917 | 1.61589248  |
| H | 5.29514470  | -2.44896396 | 2.12743034  |
| C | 6.57368977  | -0.09934030 | -0.65672623 |
| H | 5.00605264  | -0.92926827 | -1.86433829 |
| C | 7.18434162  | -0.11239105 | 0.60458531  |
| H | 7.12239426  | -0.92634743 | 2.59349585  |
| H | 3.93805504  | -3.11179039 | -1.23154656 |
| C | 7.05014027  | 0.75607394  | -1.66075246 |
| C | 8.29499346  | 0.70949179  | 0.85115371  |
| C | 8.16463097  | 1.56501394  | -1.41780439 |
| H | 8.53986006  | 2.20754730  | -2.18809721 |
| C | 8.79409312  | 1.53416335  | -0.17129097 |
| H | 6.56482277  | 0.78848070  | -2.61288195 |
| H | 8.76375071  | 0.70395402  | 1.81277097  |
| O | 9.94748467  | 2.34877376  | 0.04758675  |
| C | 10.67999285 | 2.45363400  | -1.17961890 |
| H | 10.05272063 | 2.87658989  | -1.93583852 |
| H | 11.53367545 | 3.08004229  | -1.03344327 |
| H | 11.00090792 | 1.48046080  | -1.48731247 |
| C | -3.56749556 | -3.05880712 | 0.30671346  |
| H | -3.82373283 | -3.89869704 | -0.30928026 |
| C | -3.24298482 | -3.56111667 | 1.72373420  |
| H | -2.42292488 | -4.24565821 | 1.67617176  |

|   |              |             |             |
|---|--------------|-------------|-------------|
| H | -2.98178899  | -2.73481572 | 2.34915632  |
| H | -4.09936218  | -4.05816524 | 2.12968396  |
| C | -4.74965985  | -2.06743344 | 0.39033416  |
| C | -5.67928310  | -1.92261340 | -0.65160632 |
| C | -4.87907627  | -1.29364016 | 1.55398527  |
| C | -6.74089917  | -1.01283510 | -0.50151906 |
| H | -5.58416692  | -2.49970691 | -1.54756183 |
| C | -5.89803210  | -0.40934247 | 1.69265538  |
| H | -4.16298893  | -1.40489740 | 2.34083908  |
| C | -6.84440133  | -0.25455485 | 0.67302424  |
| H | -5.98055033  | 0.17471138  | 2.58709567  |
| C | -7.69870157  | -0.85887473 | -1.51618245 |
| C | -7.89510506  | 0.65826775  | 0.83325701  |
| C | -8.85518285  | 0.80933314  | -0.17516061 |
| C | -8.75884082  | 0.04879229  | -1.35015924 |
| H | -9.49275130  | 0.16243202  | -2.12042139 |
| H | -7.62149190  | -1.43305424 | -2.41598573 |
| H | -7.96122482  | 1.24174525  | 1.72959124  |
| O | -9.93316101  | 1.73853512  | -0.00177543 |
| C | -11.10212645 | 1.27055997  | -0.68457971 |
| H | -11.90037725 | 1.97029308  | -0.54682467 |
| H | -10.89108737 | 1.17232827  | -1.72686346 |
| H | -11.39085362 | 0.32052713  | -0.28773003 |
| O | 0.11170929   | -2.21353011 | 1.48529881  |
| H | 0.99188721   | -2.57326981 | 1.63226537  |

H            -0.17070606   -1.72959526   2.26337701

*Cartesian coordinates for the optimized structure of [(phendione)Zn<sup>II</sup>(MFN)<sub>2</sub>]:*

| Atom  | Coordinates (Angstroms) |             |             |
|-------|-------------------------|-------------|-------------|
|       | X                       | Y           | Z           |
| ----- |                         |             |             |
| Zn    | 0.00037300              | 1.03758200  | 0.00052900  |
| O     | 0.80253500              | 0.69513700  | -1.96692500 |
| O     | -0.80190600             | 0.69481300  | 1.96784300  |
| C     | -2.76651400             | -0.33689300 | 3.72788100  |
| H     | -2.00048400             | 0.35635900  | 4.06224800  |
| N     | 1.23771600              | 2.77954300  | 0.54062300  |
| C     | -4.41961800             | -3.03685000 | -0.13417100 |
| N     | -1.23569600             | 2.78054800  | -0.53938800 |
| C     | -4.84800300             | -2.84976800 | -1.48029800 |
| C     | 2.76650100              | -0.33715400 | -3.72733500 |
| H     | 2.00110200              | 0.35694400  | -4.06138500 |
| C     | 0.67801300              | 3.99115800  | 0.29864000  |
| C     | -0.70618800             | 6.51484100  | -0.31734700 |
| C     | -4.62665300             | -1.50087500 | -2.14528500 |
| H     | -4.89441500             | -0.68558500 | -1.46057200 |
| H     | -5.22214300             | -1.39336200 | -3.05550100 |
| H     | -3.57151600             | -1.35574900 | -2.42444900 |
| C     | -1.34350500             | 5.19853900  | -0.59720900 |
| C     | -0.67482800             | 3.99171100  | -0.29779600 |



|   |             |             |             |
|---|-------------|-------------|-------------|
| C | 2.47495400  | 2.70864400  | 1.08169600  |
| H | 2.86491700  | 1.70787700  | 1.23438000  |
| C | -2.63363900 | 5.12629100  | -1.16771500 |
| H | -3.15674100 | 6.04828300  | -1.40339000 |
| C | 1.34786200  | 5.19744200  | 0.59765600  |
| C | 0.71183300  | 6.51429900  | 0.31727900  |
| C | -3.20534700 | 3.86976200  | -1.41236100 |
| H | -4.19460300 | 3.77590000  | -1.84650800 |
| C | 2.63792600  | 5.12412900  | 1.16822200  |
| H | 3.16190800  | 6.04570300  | 1.40358000  |
| C | -2.47301100 | 2.71067300  | -1.08041100 |
| H | -2.86393200 | 1.71024300  | -1.23281600 |
| C | 3.20839900  | 3.86712500  | 1.41330800  |
| H | 4.19754500  | 3.77244000  | 1.84751600  |
| C | -3.74447600 | -1.61815900 | 1.85337400  |
| C | 1.75865900  | -0.05375400 | -1.48757500 |
| C | -2.76886900 | -0.68658400 | 2.35527700  |
| C | -1.75860300 | -0.05317200 | 1.48819100  |
| C | -4.71337400 | -2.11883600 | 2.77119000  |
| H | -5.49332700 | -2.78064300 | 2.41293400  |
| C | 2.76847100  | -0.68755600 | -2.35491300 |
| C | 3.74324100  | -1.62024400 | -1.85343600 |
| C | 5.45635700  | -3.93418300 | 2.16942400  |
| C | 4.62572900  | -1.50580600 | 2.14524600  |
| H | 4.89434400  | -0.69044900 | 1.46094300  |

|   |             |             |             |
|---|-------------|-------------|-------------|
| H | 5.22132600  | -1.39937100 | 3.05552500  |
| H | 3.57073800  | -1.35970800 | 2.42447600  |
| C | -3.71108800 | -0.85672300 | 4.61644600  |
| H | -3.69810000 | -0.57912500 | 5.66643400  |
| C | 4.41699900  | -3.04058100 | 0.13338200  |
| C | 4.84566300  | -2.85459300 | 1.47957300  |
| C | -5.64972300 | -5.16173800 | -1.51042200 |
| H | -6.12303400 | -5.98427400 | -2.04181700 |
| C | -5.45972900 | -3.92838100 | -2.17072600 |
| C | 4.71172000  | -2.12133100 | -2.77147000 |
| H | 5.49105400  | -2.78402800 | -2.41351800 |
| C | -4.69432800 | -1.74267500 | 4.11695400  |
| H | -5.45672300 | -2.13819400 | 4.78526200  |
| C | 4.59550600  | -4.29035200 | -0.50328500 |
| H | 4.21645200  | -4.44427100 | -1.50811900 |
| C | -4.59942800 | -4.28676200 | 0.50186900  |
| H | -4.22059200 | -4.44157700 | 1.50665000  |
| C | 3.71065700  | -0.85736300 | -4.61611500 |
| H | 3.69797500  | -0.57920700 | -5.66595600 |
| C | -5.22154000 | -5.33897100 | -0.18337800 |
| H | -5.35218100 | -6.29992300 | 0.30888000  |
| C | 5.64504100  | -5.16740900 | 1.50848600  |
| H | 6.11754200  | -5.99068900 | 2.03945000  |
| C | 5.92024500  | -3.79291400 | 3.61122700  |
| H | 6.33072000  | -4.73990900 | 3.97828500  |

|   |             |             |             |
|---|-------------|-------------|-------------|
| H | 5.09699400  | -3.50503600 | 4.27887900  |
| H | 6.70470000  | -3.03005100 | 3.71612300  |
| C | 4.69306700  | -1.74446000 | -4.11704000 |
| H | 5.45513000  | -2.14033100 | -4.78551600 |
| C | 5.21658200  | -5.34353300 | 0.18138700  |
| H | 5.34619500  | -6.30436900 | -0.31136200 |
| C | -5.92336100 | -3.78592400 | -3.61249000 |
| H | -6.70705500 | -3.02224000 | -3.71706800 |
| H | -6.33473900 | -4.73232700 | -3.98006100 |
| H | -5.09977800 | -3.49852000 | -4.27993200 |
| O | -1.27015600 | 7.59646600  | -0.57412800 |
| O | 1.27685700  | 7.59546600  | 0.57363100  |
| N | -3.74161900 | -1.96453400 | 0.50664600  |
| H | -3.07423600 | -1.41463700 | -0.04785800 |
| N | 3.74002800  | -1.96728900 | -0.50687800 |
| H | 3.07315200  | -1.41703500 | 0.04788600  |
| O | -1.78618500 | -0.20003100 | 0.16927100  |
| O | 1.78610900  | -0.20121400 | -0.16870700 |

.....
